# Supplementary material for: CRISPR-mediated isolation of specific megabase segments of genomic DNA
Source: Oxford University Press journal article supplement (doi:10.1093/nar/gkx749), 2017-08-17
Supplement: gkx749_supp.pdf [file gkx749_supp.pdf]

**CRISPR-mediated Isolation of Specific Megabase Segments of Genomic DNA**

**Supplementary Information**

Pamela E. Bennett-Baker and Jacob L. Mueller

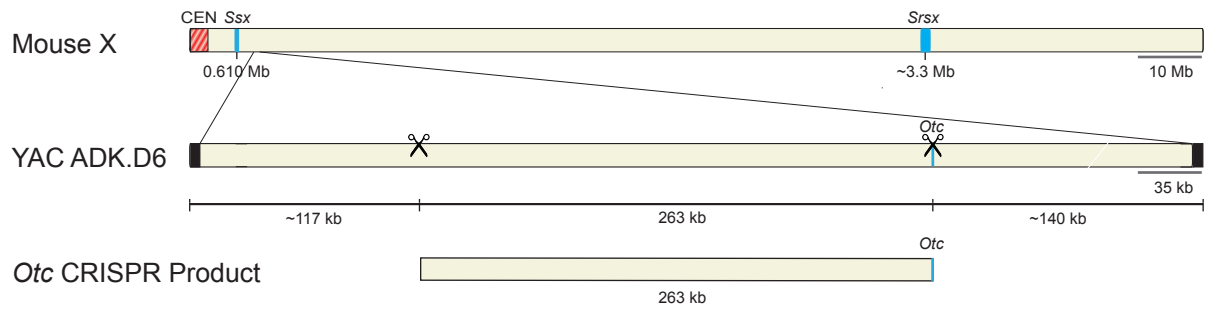

Figure S1. A large genomic locus on the mouse X chromosome, carried on the ~520 kb YAC, ADK.D6, is targeted for *in vitro* CRISPR. A pair of sgRNAs (X) are designed to flank a 263 kb segment of the mouse X chromosome containing most of the *Otc* gene. *In vitro* *Otc* CRISPR on ADK.D6, producing ~117 kb, ~140 kb, and 263 kb DNA segments, serves as a positive control for *in vitro* CRISPR digestion of mouse genomic DNA. Mouse genomic DNA is shown in yellow (□). YAC vector sequences are displayed in black (■). The genomic location and estimated size of each of the two large mouse X chromosome DNA segments for *Ssx* and *Srsx* are shown in blue (■).

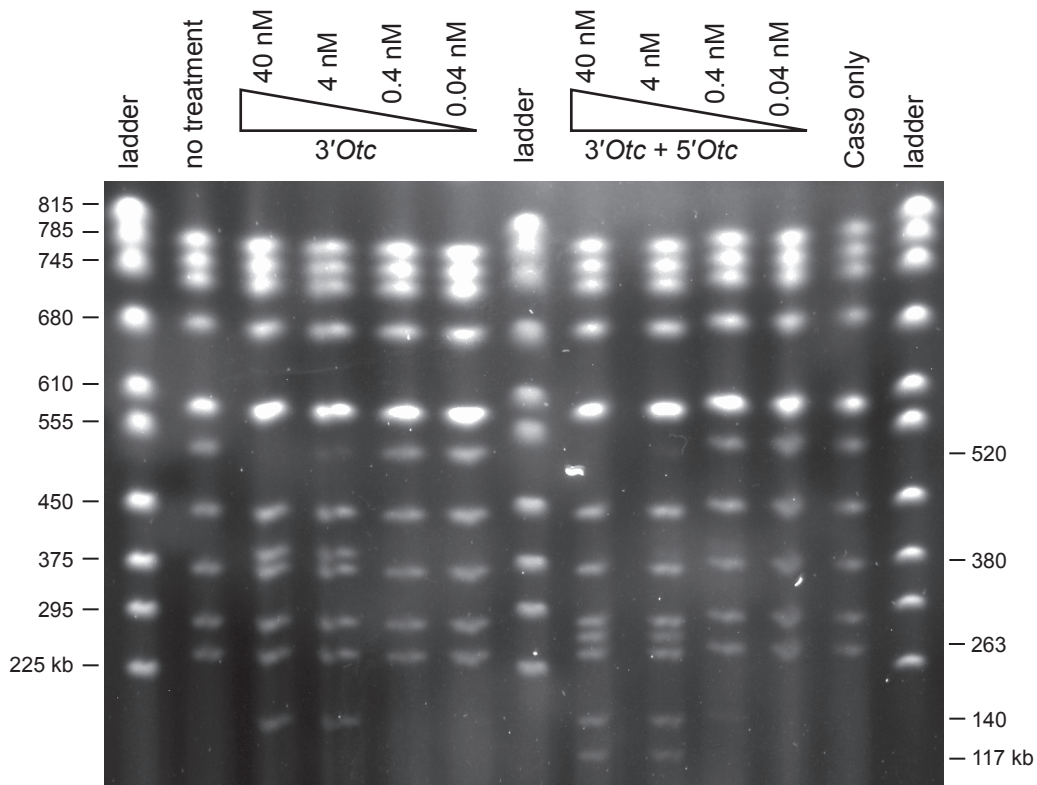

Figure S2. Assessing the optimal sgRNA/Cas9 concentration for complete *in vitro* CRISPR digestion of YAC ADK.D6. *In vitro Otc* CRISPR of approximately 4  $\mu$ g of YAC ADK.D6 DNA in 40  $\mu$ l agarose blocks is tested for completion with a range of sgRNA/Cas9 concentrations: 40 nM, 4 nM, 0.4 nM, and 0.04 nM. Each sgRNA is mixed 1:1 with Cas9 and allowed to digest the target DNA for 16 hours; a single sgRNA at 40 nM is mixed with 40 nM Cas9 and a pair of sgRNAs at 40 nM each is mixed with 80 nM Cas9. The expected *in vitro Otc* CRISPR digest products of the YAC (Supplementary Figure S1), labeled on the right, appear with increasing concentration of sgRNA/Cas9. Following *in vitro Otc* CRISPR digestion with 40 nM of each sgRNA/Cas9 combination, the ~520 kb intact YAC is not detectable on the PFG with Diamond stain (Promega). The Yeast Chromosome PFG size marker (Bio-Rad) serves as size ladders, labeled on the left.

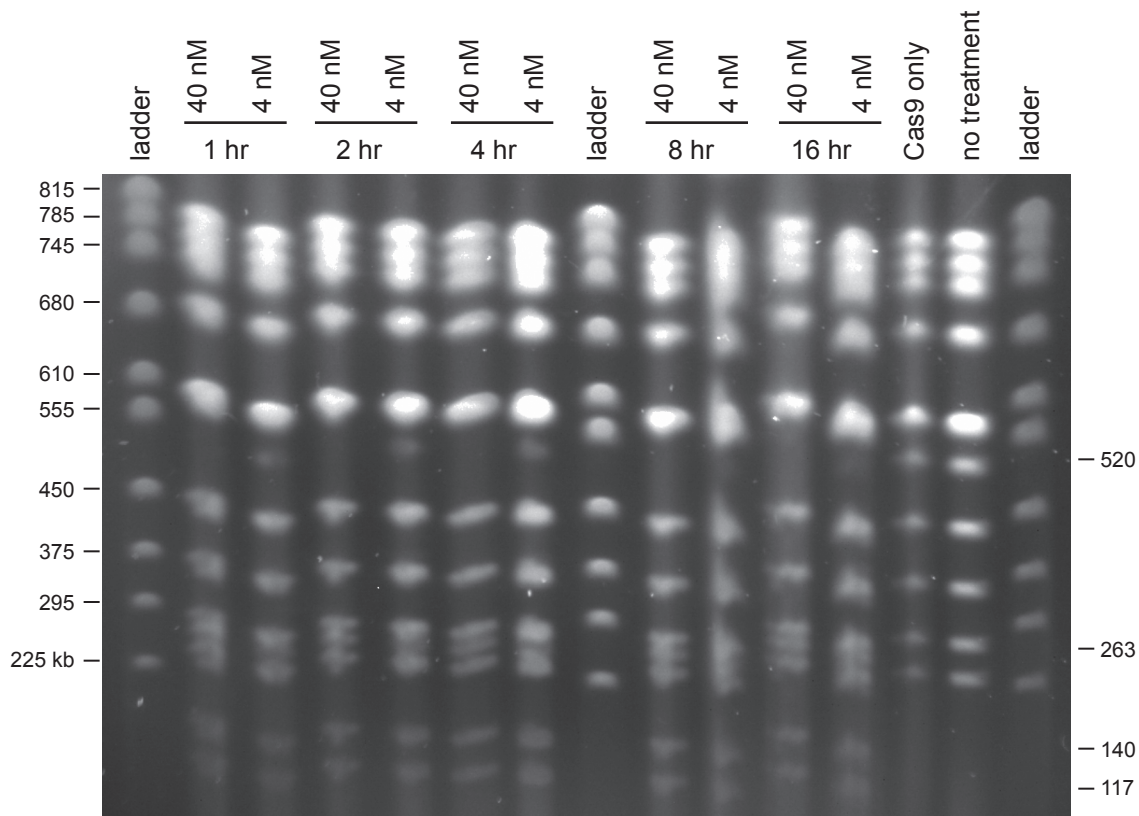

Figure S3. Assessing the optimal incubation time for complete *in vitro* CRISPR digestion of YAC ADK.D6. *In vitro Otc* CRISPR digestion of approximately 4  $\mu\text{g}$  YAC ADK.D6 DNA in 40  $\mu\text{l}$  agarose blocks is tested for completion with a range of incubation times: 1 hour through 16 hours. Reactions contain either 40 nM or 4 nM of each sgRNA, 3'*Otc* and 5'*Otc*, mixed 1:1 with Cas9. The expected *in vitro Otc* CRISPR digest products of the YAC (Supplementary Figure S1), labeled on the right, are detected in all samples on the PFG with Diamond stain (Promega). After one hour of *in vitro Otc* CRISPR digestion with 40 nM of the sgRNAs, the ~520 kb intact YAC is not detectable. Increasing duration of the incubation with 4 nM of the sgRNAs does not improve the *in vitro Otc* CRISPR digestion of the YAC DNA. The Yeast Chromosome PFG size marker (Bio-Rad) serves as size ladders, labeled on the left.

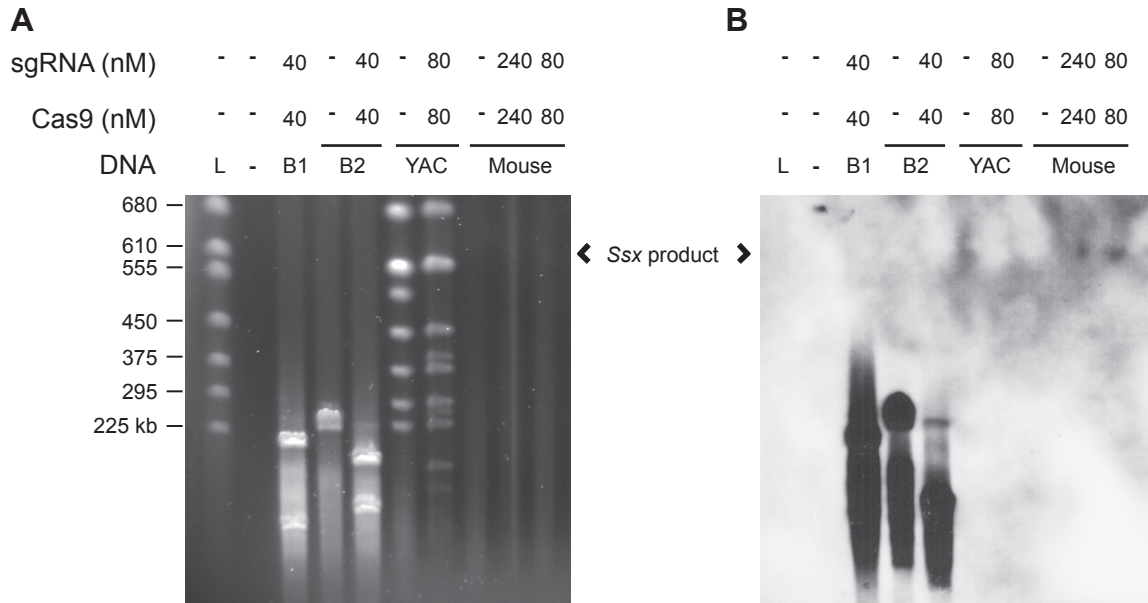

Figure S4. *In vitro* Ssx CRISPR digestion of mouse genomic DNA produces a specific, 610 kb DNA segment. **(A)** Using optimized reaction conditions, *in vitro* Ssx CRISPR digests of mouse genomic DNA and positive, bacterial artificial chromosome (BAC) clone controls (Supplementary Table S2) produce DNA segments detectable on the PFG with Diamond stain (Promega). Increasing sgRNA/Cas9 concentrations to a total of 240 nM does not improve the *in vitro* Ssx CRISPR digestion of mouse genomic DNA. The YAC, ADK.D6, is digested by *in vitro* *Otc* CRISPR as a positive control for CRISPR reaction components. The Yeast Chromosome PFG size marker (Bio-Rad) serves as size ladders (L), labeled on the left. **(B)** The Ssx identity of the faint, 610 kb mouse genomic DNA segments is confirmed by the hybridization of the PFG **(A)** Southern blot with a DIG-labelled probe specific to the Ssx sequence.

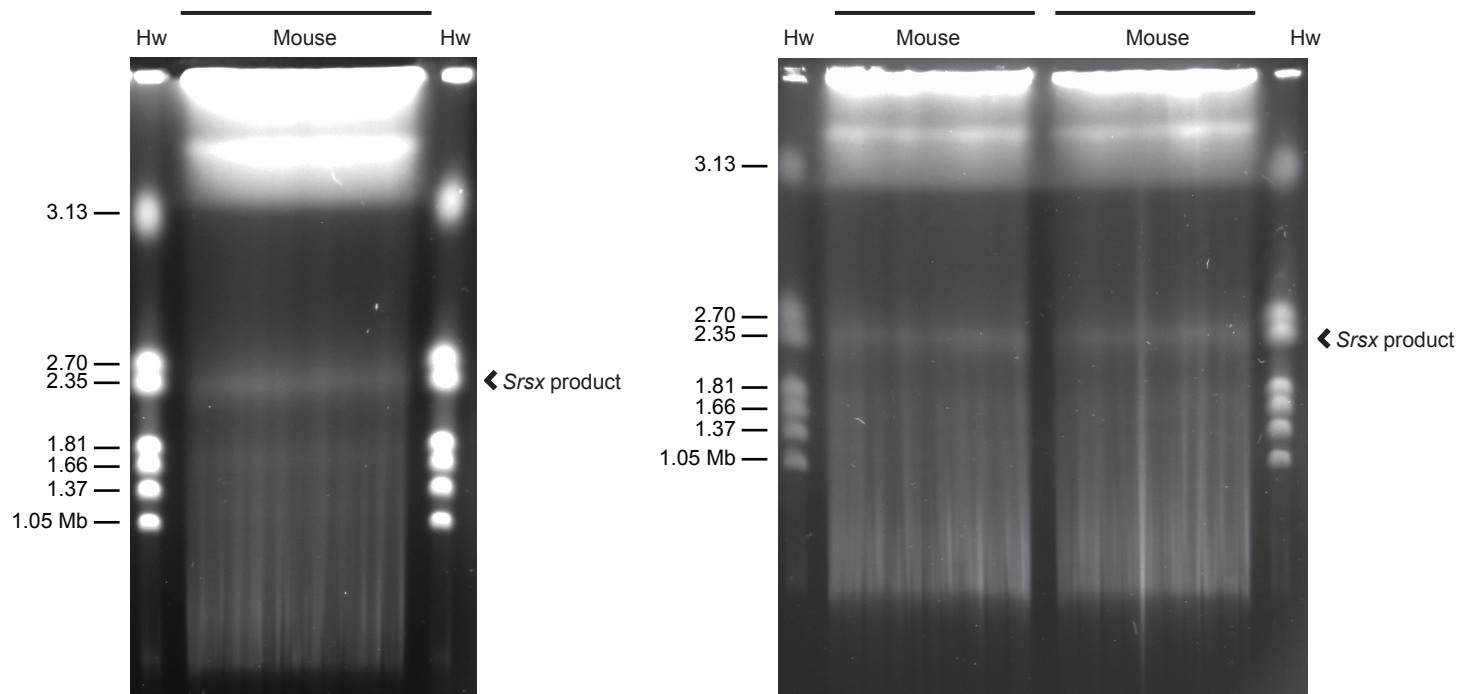

Figure S5. Resolution of the ~2.3 Mb *Srsx in vitro* CRISPR product from mouse genomic DNA by preparative PFGE, performed in triplicate. *H. wingei* (Hw) chromosomes (Bio-Rad) serve as the size ladders labeled on the left.

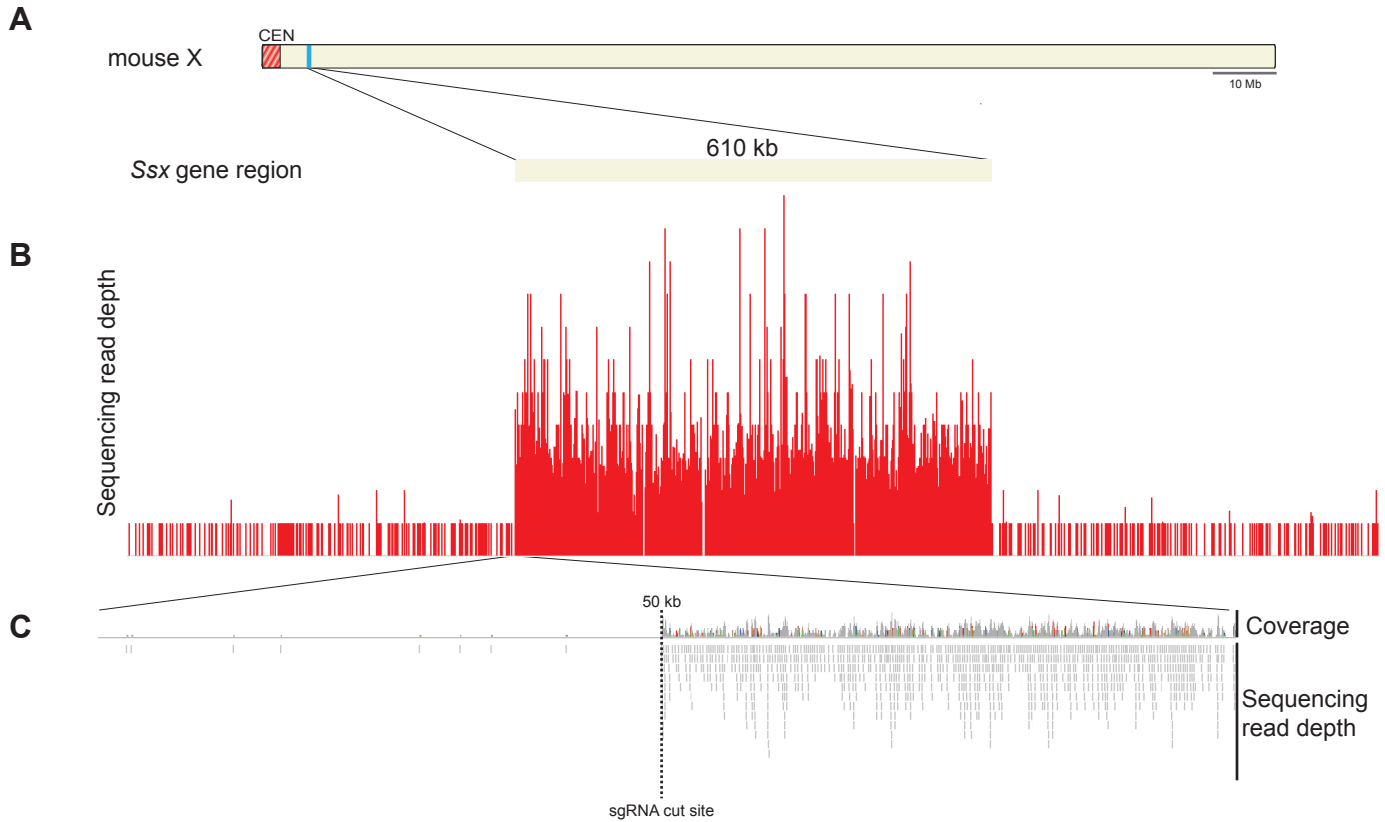

Figure S6. Enrichment of Illumina sequencing reads of the 610 kb genomic segment of the *Ssx* gene region. **(A)** Schematic of the mouse X chromosome shows the location of the *Ssx* gene region targeted by *in vitro* *Ssx* CRISPR for DNA sequencing. **(B)** Sequencing read depth of the 610 kb *Ssx* gene region and flanking 500 kb sequences. **(C)** Read depth of the 25 kb regions flanking the 5' *Ssx* sgRNA cut site (vertical dotted line).

**Table S1. Reagents**

| name                         | composition                                                                                                                 |
|------------------------------|-----------------------------------------------------------------------------------------------------------------------------|
| Zymolase Solution, 1 mg/ml   | 1 mg Zymolyase 20-T per ml of a solution of 10 mM Sodium Phosphate and 50% glycerol, final pH 7.5                           |
| NDSK                         | 0.5 M EDTA, 1% w/v N-laurylsarcosine, 1 mg/ml Proteinase K, final pH 9.5                                                    |
| PMSF stock solution, 200 mM  | 1 g PMSF dissolved in 28.7 ml 100% ethanol                                                                                  |
| Cas9 Buffer (Rnase Free)     | 200 mM HEPES, 1 M NaCl, 50 mM MgCl <sub>2</sub> , 1 mM EDTA, final pH 6.5                                                   |
| High SDS Prehyb/Hyb Solution | 50% Formamide, 7% SDS, 5X SSC, 2% w/v Blocking Reagent, 0.1% w/v N-lauroylsarcosine, 50 mM Sodium Phosphate Buffer (pH 7.0) |



**Table S2. *In vitro* CRISPR reaction components**

| CRISPR reaction | sgRNA name     | target + PAM site*    | Genome location (mm10) | Segment size (bp) | CRISPR BAC controls      | DIG-labeled Probe PCR Primer Pair*** | Probe size - Hybrid. Temp | Probe BAC controls |
|-----------------|----------------|-----------------------|------------------------|-------------------|--------------------------|--------------------------------------|---------------------------|--------------------|
| <i>Otc</i>      | 5' <i>Otc</i>  | GCCCATGGGATAATAGC AGG | 10037275-10037294      | 263132            | na                       | AAGGCCGTGACCTCCTCA                   | 482bp - 35°C              | na                 |
|                 | 3' <i>Otc</i>  | TCCATCCCAATTGTCAA TGG | 10300394-10300413      |                   | na                       | TCAGAACAGAGTTGCATTGCT                |                           |                    |
| <i>Ssx</i>      | 5' <i>Ssx</i>  | AAGATATCGCGGATGGT TGG | 8278972-8278991        | 610237            | BAC 1 (B1) = RP23-59I20  | TCACTCACCATCACTGTCATGA               | 476-486bp - 39°C          | BAC 1 = RP23-59I20 |
|                 | 3' <i>Ssx</i>  | CCTTGAGGAGCATGCGT GGG | 8889193-8889212        |                   | BAC 2 (B2) = RP23-260019 |                                      |                           |                    |
| <i>Srsx</i>     | 5' <i>Srsx</i> | ATAGTCAGTCGTAAGCT AGG | 122911126-122911145    | na**              | RP24-137N6               | TGGATGGTCTGTGAATGCCT                 | 449bp - 38°C              | RP24-327G2         |
|                 | 3' <i>Srsx</i> | CTACCACAATGCGTCTG TGG | 126299997-126300016    |                   | RP24-159H9               |                                      |                           |                    |

\**Srsx* sgRNAs were amplified from pX458 plasmids with TTAATACGACTCACTATAgg(17mer gRNA target sequence)gtttaagagctatgctgGA forward primers and AAAAAAAGCACCGACTCGGTGC reverse primer

\*\*The reference sequence for the *Srsx* ampliconic region contains five gaps, prohibiting the accurate estimation of its size.

\*\*\* Annealing temperature for all primers is 60°C

**Table S3. Illumina Sequencing Summary Information**

| <u>Genomic Region</u> | <u>Target Region Size (bp)</u> | <u>el Purification Yield (ng)</u> | <u>Total Reads</u> | <u>Mean Coverage of Target</u> | <u>% on-target bases</u> | <u>Fold Enrichment</u> |
|-----------------------|--------------------------------|-----------------------------------|--------------------|--------------------------------|--------------------------|------------------------|
| <i>Otc</i>            | 263,132                        | 7.2                               | 1,742,930          | 1.23                           | 0.7                      | 75.34                  |
| <i>Ssx</i>            | 610,205                        | 3.2                               | 1,090,176          | 2.09                           | 3.9                      | 173.72                 |
| <i>Srsx_1</i>         | 3,388,890                      | 3.1                               | 10,040,103         | 9.07                           | 4.9                      | 39.23                  |
| <i>Srsx_2</i>         | 3,388,890                      | 7.0                               | 2,419,266          | 4.12                           | 9.5                      | 76.73                  |
| <i>Srus_3</i>         | 3,388,890                      | 4.1                               | 2,236,130          | 4.21                           | 10.7                     | 85.91                  |

Based upon single end (forward) read mapping of the Illumina libraries
